# Supplementary material
Source: publisher site journal article supplement (https://www.dovepress.com/article/243537)
Supplement: Supplementary file 1 [file get_supplementary_file.php]

Supporting Information

**Immunostimulatory potential of MoS2 nanosheets: enhancing dendritic cell maturation, migration and T cell elicitation**

*Lei Deng 1, 2, Xiaoli Pan1, Yulong Zhang1, Sujing Sun1, Liping LV1, Lei Gao1, Ping Ma1, Huisheng Ai2, Qianqian Zhou1, Xiaohui Wang1, Linsheng Zhan1*

1Department of Emerging Transfusion Technology, Institute of Health Service and Transfusion Medicine, Academy of Military Medical Sciences, Beijing, P. R. China

2Department of Hematology, The Fifth Medical Center of Chinese PLA General Hospital, Beijing, P. R. China

Correspondence: *Xiaohui Wang; Linsheng Zhan*

Department of Emerging Transfusion Technology, Institute of Health Service and Transfusion Medicine, Academy of Military Medical Sciences, Beijing, P. R. China

Email: lszhan91@yahoo.com; [lovechina1980@163.com](mailto:lovechina1980@163.com).

Table S1. Zeta potential of MSNs

| **Designation** | **Dispersed**  **in water (mV)** | **Dispersed**  **in 1640 (mV)** |
| --- | --- | --- |
| S-MoS2 | -42.53 ± 2.23 | -9.79 ± 0.73 |
| L-MoS2 | -42.43 ± 1.34 | -8.82 ± 0.65 |

Abbreviations: MSNs, MoS2 nanosheets.

**
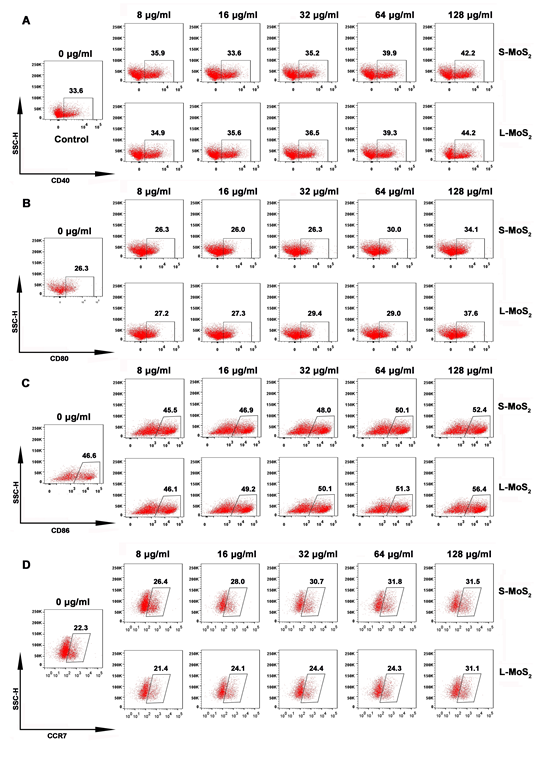
**

**Figure S1.** The dose effect of MSN-treatment on the expression of CD40, CD80, CD86 and CCR7 on DCs.

**Notes:** A representative dataset from there replicates is shown.

**Abbreviations:** DCs, dendritic cells; S-MoS2, Small MoS2;L-MoS2, Large MoS2; CD, cell differentiation; CCR7, chemokine C-C-Motif Receptor 7.


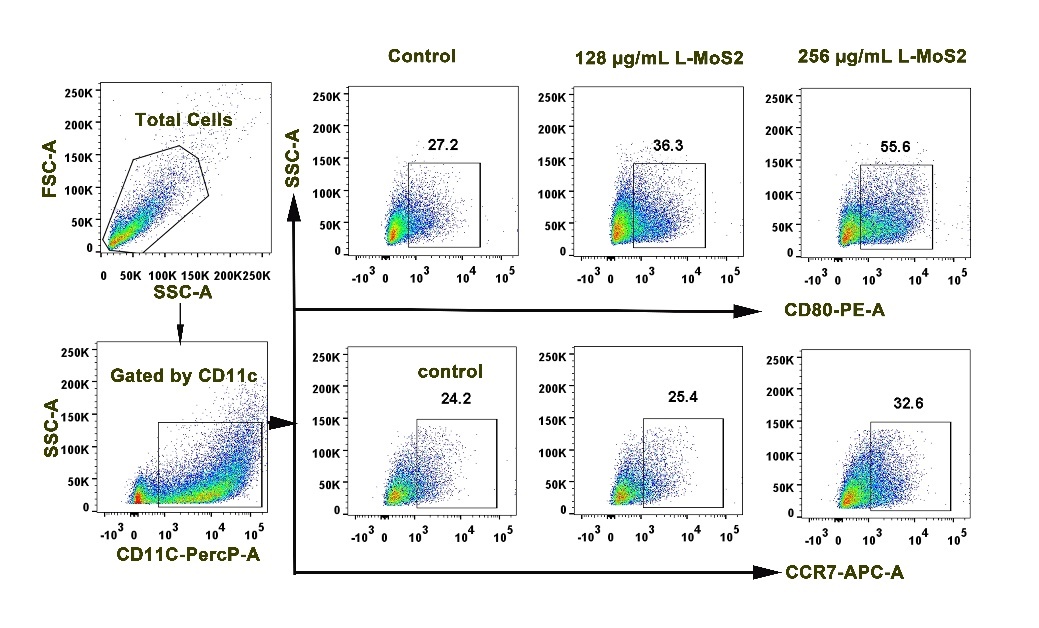


**Figure S2.** Improving incubation concentration promoted the expression of CD80 and CCR7 on MSN-treated DCs.

**Notes:** DCs were incubated with MSNs at a respective concentration of 128 µg/mL and 256 µg/mL for 48 h, the expression of CD80 and CCR7 on DCs was detected by FACS. Naïve DCs were set as control.

**Abbreviations:** DCs, dendritic cells; L-MoS2, Large MoS2; CD, cell differentiation; CCR7, chemokine C-C-Motif Receptor 7; MSNs, MoS2 nanosheets.


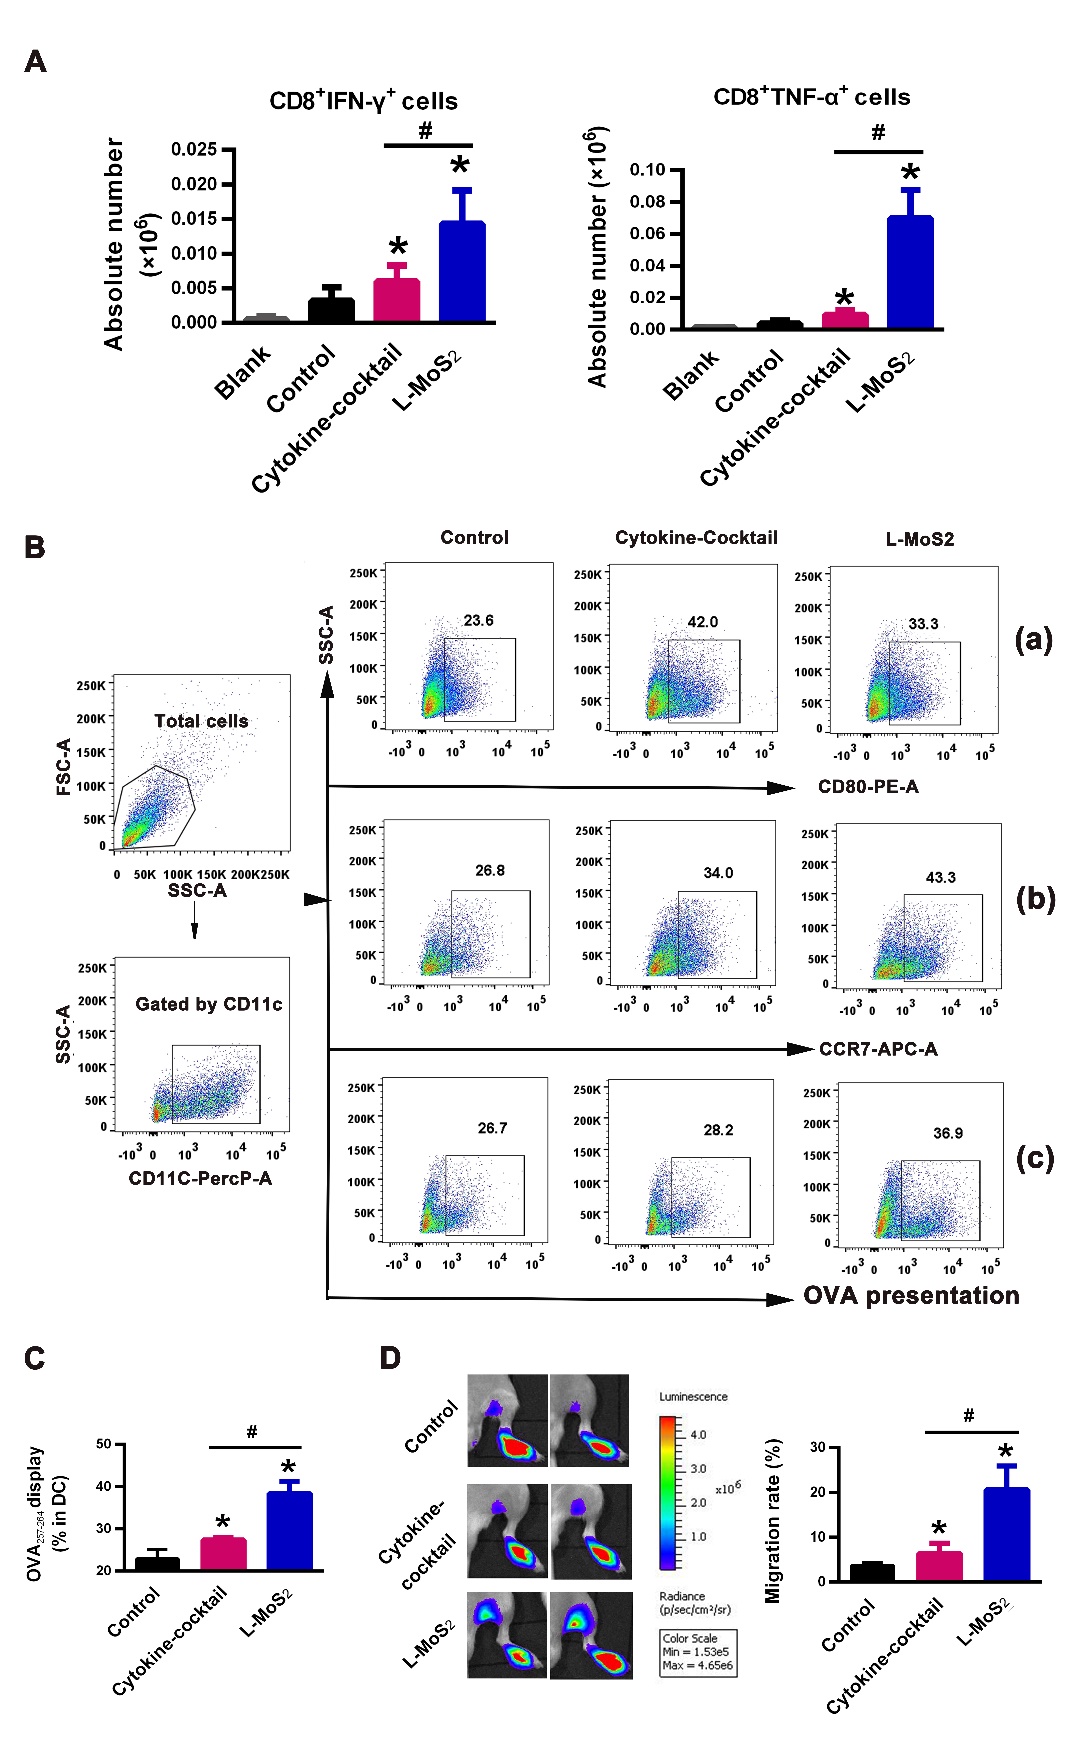


**Figure S3** Comparing MSNs with the conventional adjuvant of cytokine-cocktails.

**Notes:** (A) Absolute number of IFN-γ+ CD8+ T cells and TNF-α+ CD8+ T cells in the PLNs. The vaccination process was shown in Figure 6A. (B) The expression of CD80 (a), CCR7 (b) and OVA257-264 display (c) of DCs was detected by flow cytometry. (C) Statistical data of the OVA display in DCs. (D) The in vivo homing of tissue resident DCs. A total of 1 × 106 DCs derived from L2G85.C57BL/6J mice were injected into the footpads of mice, and the in vivo migration to the PLNs was visualized at 48 h by bioluminescence imaging. N = 4 for each group. *p < 0.05 compared with the control group. #p < 0.05 compared with cytokine-cocktail group.

**Abbreviations:** PLN, popliteal lymph node; DCs, dendritic cells; MSNs, MoS2 nanosheets; IFN-γ, interferon-γ; TNF-α，[tumor necrosis factor-α](https://www.so.com/link?m=aJJMHJu6rfDO0jpVRdKZJIja6E067Ma%2BOWw7Nv5JSb6CiBm1x%2Ffv0qFSjiti8qmsyVlzZ61HPwMS%2FI9hzkXPiYOZdPj%2BuyrG7uJh2UI%2FikvjNh7rXcmAXP7Ye%2BSpnt0z%2Bq9bh7rvGc6qSqgNgmzPxXiN%2B30Q%3D); CD, cell differentiation; OVA, ovalbumin; L-MoS2, Large MoS2.
